# Supplementary material
Source: publisher figshare collection journal article supplement (https://asha.figshare.com/articles/dataset/_/13626509)
Supplement: Supplementary file 2 [file 1]

**Supplemental Material S1.** The inclusion and exclusion criteria based on the Population, Intervention, Control, Outcomes, and Study Design (PICOS) strategy.

|                                                                                                                                      |           |                                                                                                                                                                                                                                                                                                                              |
|--------------------------------------------------------------------------------------------------------------------------------------|-----------|------------------------------------------------------------------------------------------------------------------------------------------------------------------------------------------------------------------------------------------------------------------------------------------------------------------------------|
| <b>Population</b>                                                                                                                    | Inclusion | <ul style="list-style-type: none"> <li>Adults (<math>\geq 18</math> years of age)</li> <li>Post lingual bilateral sensorineural hearing loss</li> <li>Age-appropriate cognitive function</li> </ul>                                                                                                                          |
|                                                                                                                                      | Exclusion | <ul style="list-style-type: none"> <li>Conductive component (ABG <math>&gt; 10</math> dB, or an abnormal acoustic immitance finding)</li> <li>Laboratory simulation of hearing loss</li> <li>Hearing status not clearly defined</li> </ul>                                                                                   |
| <b>Intervention</b>                                                                                                                  | Inclusion | <ul style="list-style-type: none"> <li>Binaural digital hearing aid use</li> <li>Specific adjustments of digital signal processing features in a binaural amplification</li> </ul>                                                                                                                                           |
|                                                                                                                                      | Exclusion | <ul style="list-style-type: none"> <li>CIs, BAHAs, (bi)CROS, bimodal amplification, unilateral amplification, or laboratory simulation of hearing aid use</li> </ul>                                                                                                                                                         |
| <b>Control</b>                                                                                                                       | Inclusion | <ul style="list-style-type: none"> <li>Between subject comparison</li> <li>Within subject comparison (subjects are their own control; comparison before and after intervention)</li> </ul>                                                                                                                                   |
| <b>Outcomes</b>                                                                                                                      | Inclusion | <ul style="list-style-type: none"> <li>Measures of the global cognitive function</li> <li>Measures of specific cognitive resources e.g., working memory, and etcetera</li> <li>Measures of the aided benefit in terms of listening effort</li> <li>Measures of the aided benefit in terms of speech understanding</li> </ul> |
| <b>Study Design</b>                                                                                                                  | Inclusion | <ul style="list-style-type: none"> <li>(Quasi-)experimental studies</li> <li>English written articles</li> </ul>                                                                                                                                                                                                             |
|                                                                                                                                      | Exclusion | <ul style="list-style-type: none"> <li>Case reports, systematic reviews, meta-analyses, narrative reviews, editorial letters, clinical protocols, and meeting abstracts</li> </ul>                                                                                                                                           |
| ABG = air-bone gap; BAHA = bone anchored hearing aid; CI = cochlear implant; (bi-)CROS = (bilateral) contralateral routing of signal |           |                                                                                                                                                                                                                                                                                                                              |
