# Supplementary material
Source: publisher figshare collection journal article supplement (https://asha.figshare.com/articles/dataset/_/13626509)
Supplement: Supplementary file 3 [file 1]

**Supplemental Material S3.** The results of the statistical analyses.

| Section                                                                                                                                             | Wilcoxon Signed-Ranks test | F test with True Value 0    | ICC    | Degree of IRR |
|-----------------------------------------------------------------------------------------------------------------------------------------------------|----------------------------|-----------------------------|--------|---------------|
| Introduction                                                                                                                                        | $Z = 0.00; p = 1.00$       | $F(15,15) = 0.92; p = .561$ | -0.089 | n.a.          |
| Materials and methods                                                                                                                               | $Z = -0.716; p = .47$      | $F(15,15) = 2.01; p = .094$ | 0.51   | n.a.          |
| Results                                                                                                                                             | $Z = -0.00; p = 1.00$      | n.a.                        | n.a.   | n.a.          |
| Discussion and conclusion                                                                                                                           | $Z = -0.43; p = .67$       | $F(15,15) = 4.73; p = .002$ | 0.80   | excellent     |
| Total score                                                                                                                                         | $Z = -0.19; p = .85$       | $F(15,15) = 1.74; p = .148$ | 0.43   | n.a.          |
| ICC = intra-class correlation coefficient; IRR = inter-rater reliability; n.a. = not applicable, since the non-significant between-subject variance |                            |                             |        |               |
