# Supplementary material
Source: publisher figshare collection journal article supplement (https://asha.figshare.com/articles/dataset/_/13626509)
Supplement: Supplementary file 4 [file 1]

**Supplemental Material S4.** The first investigator’s total score and overall methodological rating of all included studies.

|     | Publication                | Total score | Rating    |
|-----|----------------------------|-------------|-----------|
| 1.  | Cox & Xu, 2010             | 37          | good      |
| 2.  | Dawes & Munro, 2017        | 36          | good      |
| 3.  | Desjardins & Doherty, 2014 | 34          | good      |
| 4.  | Ellis & Munro, 2015        | 32          | moderate  |
| 5.  | Foo et al., 2007           | 33          | moderate  |
| 6.  | Keidser et al., 2013       | 32          | moderate  |
| 7.  | Lopez-Poveda et al., 2017  | 29          | very weak |
| 8.  | Moradi et al., 2014        | 31          | weak      |
| 9.  | Neher et al., 2016         | 31          | weak      |
| 10. | Picou et al., 2013         | 38          | good      |
| 11. | Rudner et al., 2009        | 32          | moderate  |
| 12. | Rudner et al., 2011        | 34          | good      |
| 13. | Shehorn et al., 2018       | 26          | very weak |
| 14. | Souza & Sirow, 2014        | 29          | very weak |
| 15. | Wendt et al., 2017         | 26          | very weak |
| 16. | Yumba, 2017                | 30          | weak      |

## References

- Cox, R. M., & Xu, J. (2010). Short and long compression release times: Speech understanding, real-world preferences, and association with cognitive ability. *Journal of the American Academy of Audiology*, 21(2), 121–138. <https://doi.org/10.3766/jaaa.21.2.6>
- Dawes, P., & Munro, K. J. (2017). Auditory distraction and acclimatization to hearing aids. *Ear and Hearing*, 38(2), 174–183. <https://doi.org/10.1097/AUD.0000000000000366>
- Desjardins, J. L., & Doherty, K. A. (2014). The effect of hearing aid noise reduction on listening effort in hearing-impaired adults. *Ear and Hearing*, 35(6), 600–610. <https://doi.org/10.1097/AUD.0000000000000028>
- Ellis, R. J., & Munro, K. J. (2015). Predictors of aided speech recognition, with and without frequency compression, in older adults. *International Journal of Audiology*, 54(7), 467–475. <https://doi.org/10.3109/14992027.2014.996825>
- Foo, C., Rudner, M., Ronnberg, J., & Lunner, T. (2007). Recognition of speech in noise with new hearing instrument compression release settings requires explicit cognitive storage and processing capacity. *Journal of the American Academy of Audiology*, 18(7), 618–631. <https://doi.org/10.3766/jaaa.18.7.8>
- Keidser, G., Dillon, H., Convery, E., & Mejia, J. (2013). Factors influencing individual variation in perceptual directional microphone benefit. *Journal of the American Academy of Audiology*, 24(10), 955–968. <https://doi.org/10.3766/jaaa.24.10.7>
- Lopez-Poveda, E. A., Johannesen, P. T., Perez-Gonzalez, P., Blanco, J. L., Kalluri, S., & Edwards, B. (2017). Predictors of hearing-aid outcomes. *Trends in Hearing*, 21. <https://doi.org/10.1177/2331216517730526>
- Moradi, S., Lidestam, B., Hallgren, M., & Ronnberg, J. (2014). Gated auditory speech perception in elderly hearing aid users and elderly normal-hearing individuals: Effects of hearing impairment and cognitive capacity. *Trends in Hearing*, 18, 1–12. <https://doi.org/10.1177/2331216514545406>
- Neher, T., Wagener, K. C., & Fischer, R. L. (2016). Directional processing and noise reduction in hearing AIDs: Individual and situational influences on preferred setting. *Journal of the American Academy of Audiology*, 27(8), 628–646. <https://doi.org/10.3766/jaaa.15062>
- Picou, E. M., Ricketts, T. A., & Hornsby, B. W. (2013). How hearing aids, background noise, and visual cues influence objective listening effort. *Ear and Hearing*, 34(5), 52–64. <https://doi.org/10.1097/AUD.0b013e31827f0431>
- Rudner, M., Foo, C., Ronnberg, J., & Lunner, T. (2009). Cognition and aided speech recognition in noise: Specific role for cognitive factors following nine-week experience with adjusted compression settings in hearing aids. *Scandinavian Journal of Psychology*, 50(5), 405–418. <https://doi.org/10.1111/j.1467-9450.2009.00745.x>
- Rudner, M., Ronnberg, J., & Lunner, T. (2011). Working memory supports listening in noise for persons with hearing impairment. *Journal of the American Academy of Audiology*, 22(3), 156–167. <https://doi.org/10.3766/jaaa.22.3.4>
- Shehorn, J., Marrone, N., & Muller, T. (2018). Speech perception in noise and listening effort of older adults with nonlinear frequency compression hearing aids. *Ear and Hearing*, 39(2), 215–225. <https://doi.org/10.1097/AUD.0000000000000481>
- Souza, P. E., & Sirow, L. (2014). Relating working memory to compression parameters in clinically fit hearing aids. *American Journal of Audiology*, 23(4), 394–401. [https://doi.org/10.1044/2014\\_AJA-14-0006](https://doi.org/10.1044/2014_AJA-14-0006)
- Wendt, D., Hietkamp, R. K., & Lunner, T. (2017). Impact of noise and noise reduction on processing effort: A pupillometry study. *Ear and Hearing*, 38(6), 690–700. <https://doi.org/10.1097/AUD.0000000000000454>
- Yumba, W. K. (2017). Cognitive processing speed, working memory, and the intelligibility of hearing aid-processed speech in persons with hearing impairment. *Frontiers in Psychology*, 8, 1308. <https://doi.org/10.3389/fpsyg.2017.01308>
